# Supplementary material
Source: publisher figshare collection journal article supplement (https://sage.figshare.com/ndownloader/files/20045714)
Supplement: Supplementary file 1 [file 20045714]

## Supplement 2: Summary of all applications

| Application               | Description                                                                                                      | Free of charge?                                                                                           |
|---------------------------|------------------------------------------------------------------------------------------------------------------|-----------------------------------------------------------------------------------------------------------|
| GoodReader                | PDF reader                                                                                                       | No                                                                                                        |
| Notability                | Application for notes and PDF reader, records audio                                                              | No                                                                                                        |
| Word                      | Document management                                                                                              | Yes                                                                                                       |
| Adobe Reader              | Free PDF reader if you do not want to pay for GoodReader                                                         | Yes                                                                                                       |
| Reader                    | To read books from publisher Thieme                                                                              | Yes                                                                                                       |
| Medinet                   | Application for clinical schemes on our department                                                               | Yes                                                                                                       |
| Dropbox                   | For access to cloud-based file storage                                                                           | Yes                                                                                                       |
| Google Drive              | For access to cloud-based file storage                                                                           | Yes                                                                                                       |
| Google Documents          | To read and write documents in Google Drive                                                                      | Yes                                                                                                       |
| Gmail                     | e-mail reader                                                                                                    | Yes                                                                                                       |
| e-Anatomy                 | Anatomy application from IMAIOS                                                                                  | Subscription                                                                                              |
| STATdx                    | Radiological facts on several levels, many pictures, accessed via internet page                                  | Subscription                                                                                              |
| RADPrimer                 | Self-test, internet page                                                                                         | Subscription                                                                                              |
| Radiopaedia               | Cases and teaching modules, free package to install the app, additional packages can be purchased within the app | Yes                                                                                                       |
| Monster Anatomy Knee Lite | Knee anatomy with MR/CT images                                                                                   | Yes                                                                                                       |
| ChestDiffDX               | Differential diagnoses for different findings on CT thorax                                                       | Yes                                                                                                       |
| Fieldrad                  | Patterns on CT thorax                                                                                            | Yes                                                                                                       |
| Pedradiology              | Pediatric radiology cases                                                                                        | Yes                                                                                                       |
| Radiology                 | Journal                                                                                                          | Yes, but requires membership of Radiological Society of North America (RSNA), which is free for residents |
| One Night at the ER       | Cases with clear descriptions                                                                                    | Yes                                                                                                       |
| CTisus                    | Radiological facts, several different apps                                                                       | Yes                                                                                                       |
| Radiology Assistant       | Radiological facts                                                                                               | No                                                                                                        |
| E-cases                   | From IMAIOS, cases, access to log-in granted via e-Anatomy                                                       | Subscription                                                                                              |
